# Supplementary material for: Computationally defined and in vitro validated putative genomic safe harbour loci for transgene expression in human cells
Source: bioRxiv or medRxiv preprint supplement (doi:10.1101/2021.12.07.471422), 2022-01-25

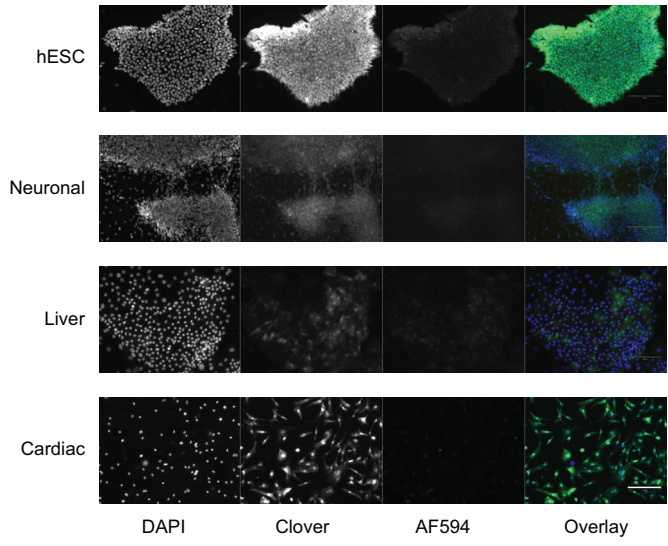

Supplement: Supplementary file [file media-5.pdf]
